# Supplementary material for: Characteristics of estrogenic/antiestrogenic activities during the anoxic/aerobic biotreatment process of simulated textile dyeing wastewater
Source: Royal Society of Chemistry journal article supplement (doi:10.1039/c5ra25991f), 2016-01-01
Supplement: c5ra25991f1.pdf [file c5ra25991f1.pdf]

**Supplementary Table 1.** Composition of simulated textile dyeing wastewater

| Materials used                  | Concentration (mg/L) | Molecular structure                                                                  |
|---------------------------------|----------------------|--------------------------------------------------------------------------------------|
| Starch                          | 1000                 |                                                                                      |
| NH <sub>4</sub> Cl              | 85                   |                                                                                      |
| KH <sub>2</sub> PO <sub>4</sub> | 20                   |                                                                                      |
| Na <sub>2</sub> SO <sub>4</sub> | 50                   |                                                                                      |
| NaHCO <sub>3</sub>              | 60                   |                                                                                      |
| Dyes                            | 50                   |                                                                                      |
| Direct Red 28                   | 10                   | 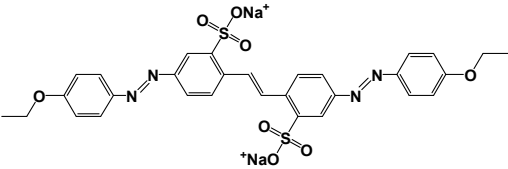   |
| Direct Yellow 12                | 10                   |    |
| Reactive Black 5                | 10                   |   |
| Reactive Blue 21                | 10                   |  |
| Reactive Blue 19                | 10                   |  |

**Supplementary Table 2.** Products detected in samples AN and AE by GC-MS

| Sample AN               |                                                                                     |                                   |                             |                                                                                       |                                   |
|-------------------------|-------------------------------------------------------------------------------------|-----------------------------------|-----------------------------|---------------------------------------------------------------------------------------|-----------------------------------|
| Name                    | Structure                                                                           | Possible effect on the yeast cell | Name                        | Structure                                                                             | Possible effect on the yeast cell |
| propionic acid          | 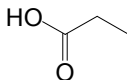   | inhibit the fermentation rate     | 2-hydroxypropionic acid     |    |                                   |
| butyric acid            |    | inhibit the fermentation rate     | benzoic acid                |    | inhibit the fermentation rate     |
| valeric acid            |    |                                   | phenylacetic acid           |    | had the growth inhibitory effect  |
| caproic acid            |    | inhibit the fermentation rate     | phenol                      |    |                                   |
| isobutyric acid         |   |                                   | m-cresol                    |  | antifungal activity               |
| 2-methylbutyric acid    |  |                                   | 4-methylcatechol            |  | decrease the growth rate          |
| 3-methylbutyric acid    |  |                                   |                             |                                                                                       |                                   |
| Sample AE               |                                                                                     |                                   |                             |                                                                                       |                                   |
| 2-methylbutyric acid    |  |                                   | 4-methoxy-phenylacetic acid |  |                                   |
| 2-hydroxypropionic acid |  |                                   | p-phenetidine               |  |                                   |
| phenylacetic acid       |  | had the growth inhibitory effect  | phthalic acid               |  | mimics 17β-estradiol actions      |
